# Supplementary material
Source: PubMed Central journal article supplement (PMC10560126)

# Supplementary Figure 1

a

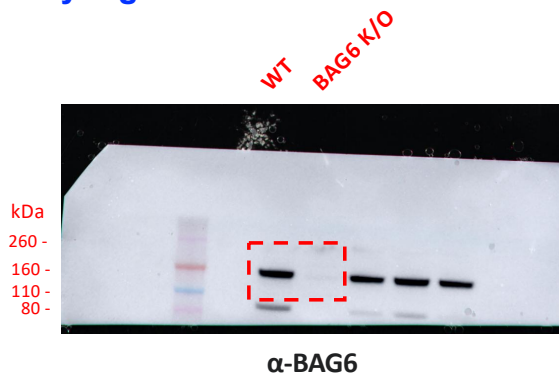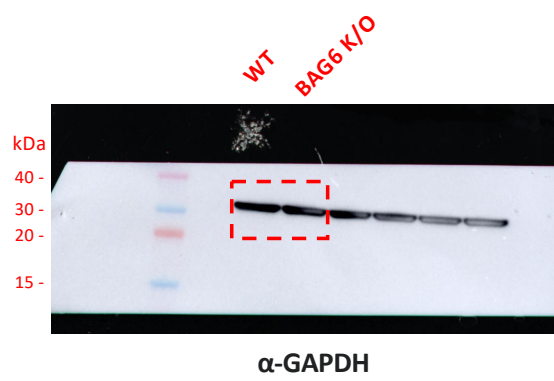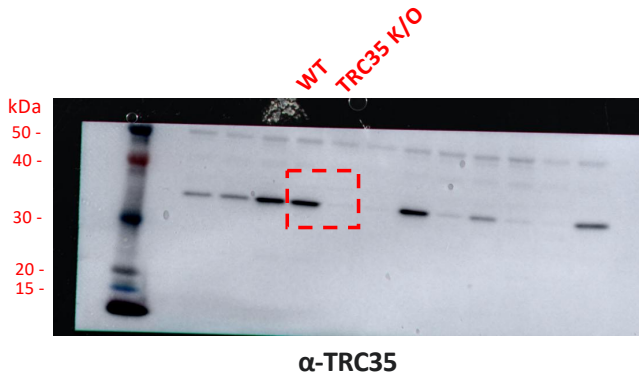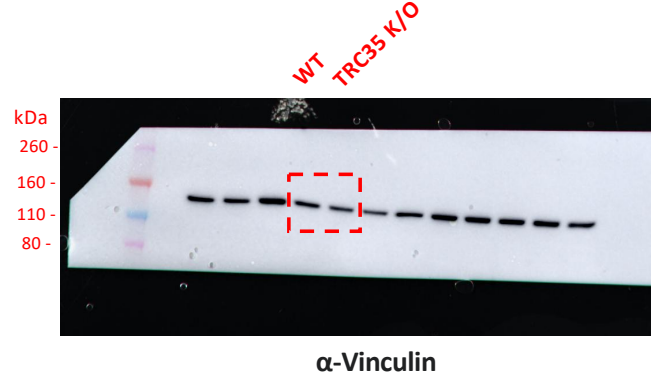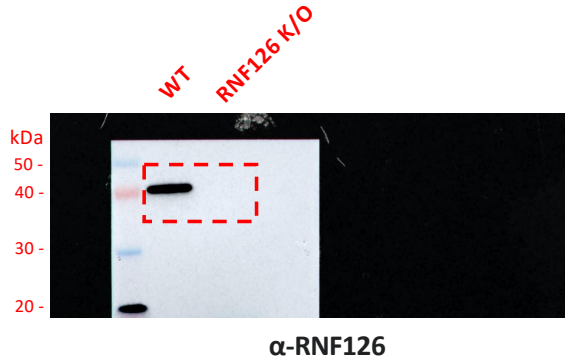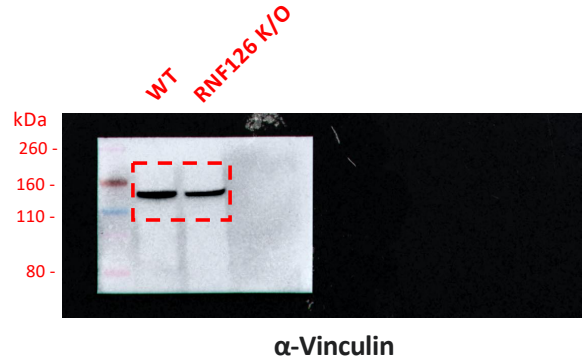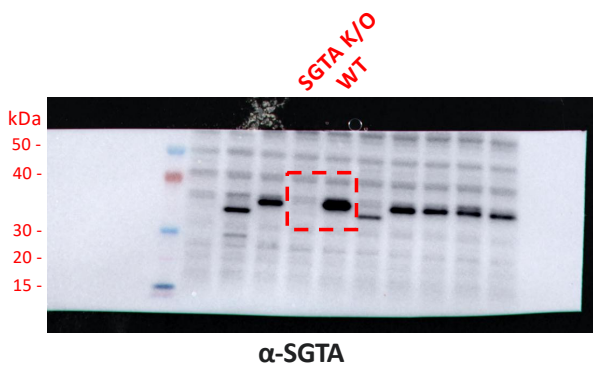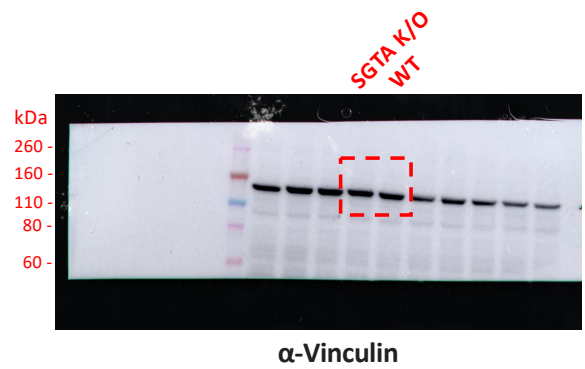

\*Orientation is mirrored horizontally in Figure 5D

\*Orientation is mirrored horizontally in Figure 5D

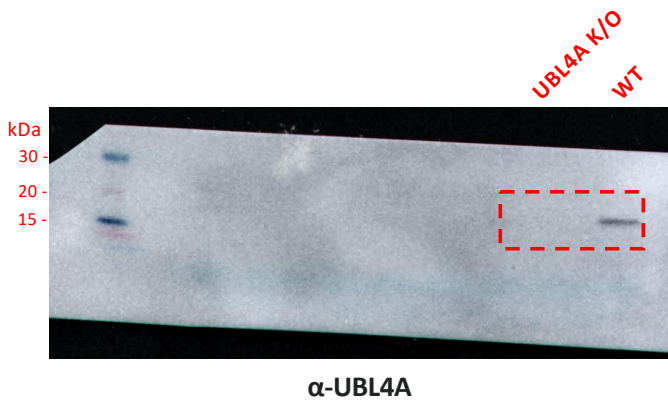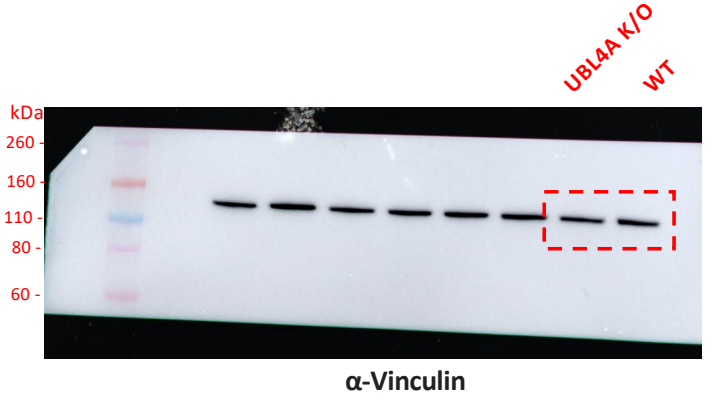

\*Orientation is mirrored horizontally in Figure 5D

\*Orientation is mirrored horizontally in Figure 5D

**b**

Biological replicate 1

SMAD4 Genotype: WT WT WT R/T R/T  
BAG6 Genotype: WT WT WT K/O K/O

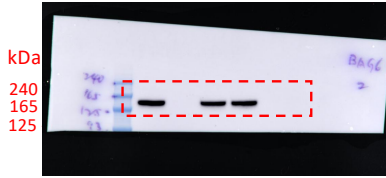

$\alpha$ -BAG6

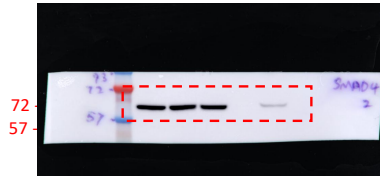

$\alpha$ -SMAD4

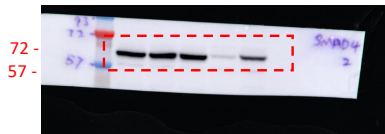

$\alpha$ -SMAD4

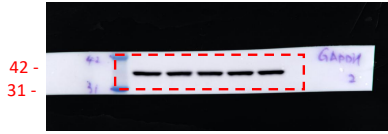

$\alpha$ -GAPDH

Biological replicate 2

SMAD4 Genotype: WT WT WT R/T R/T  
BAG6 Genotype: WT WT WT K/O K/O

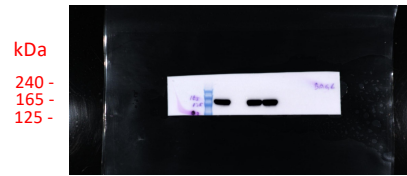

$\alpha$ -BAG6

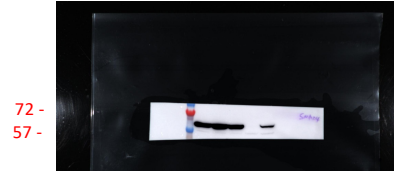

$\alpha$ -SMAD4

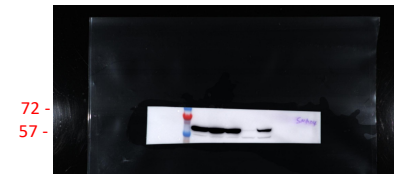

$\alpha$ -SMAD4

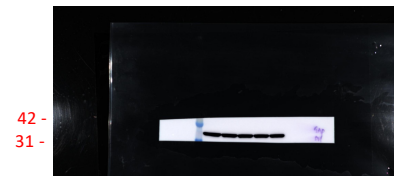

$\alpha$ -GAPDH

Biological replicate 3

SMAD4 Genotype: WT WT WT R/T R/T  
BAG6 Genotype: WT WT WT K/O K/O

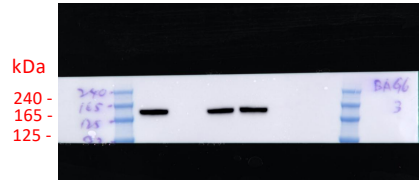

$\alpha$ -BAG6

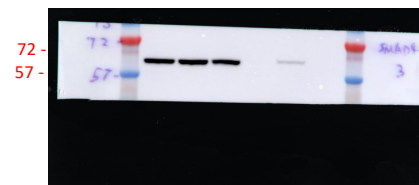

$\alpha$ -SMAD4

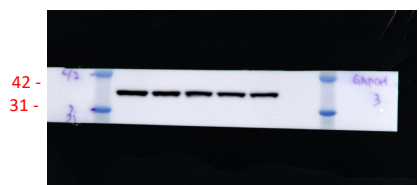

$\alpha$ -GAPDH

**c**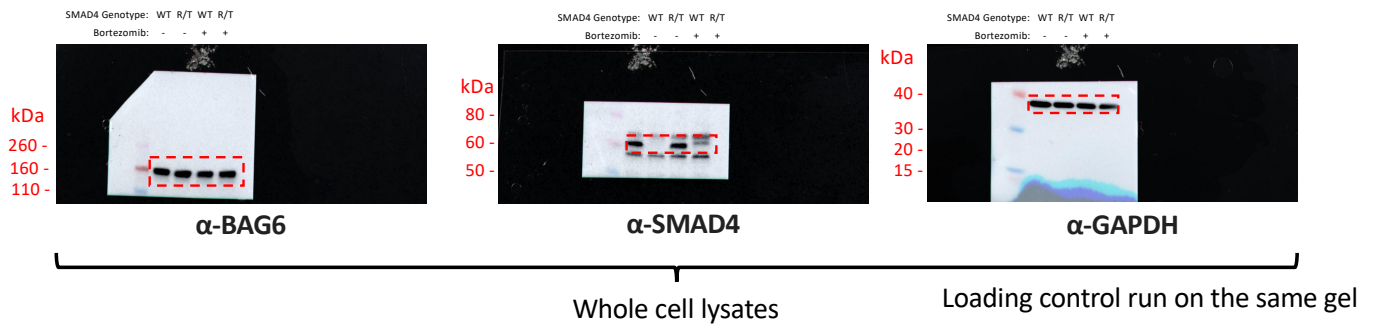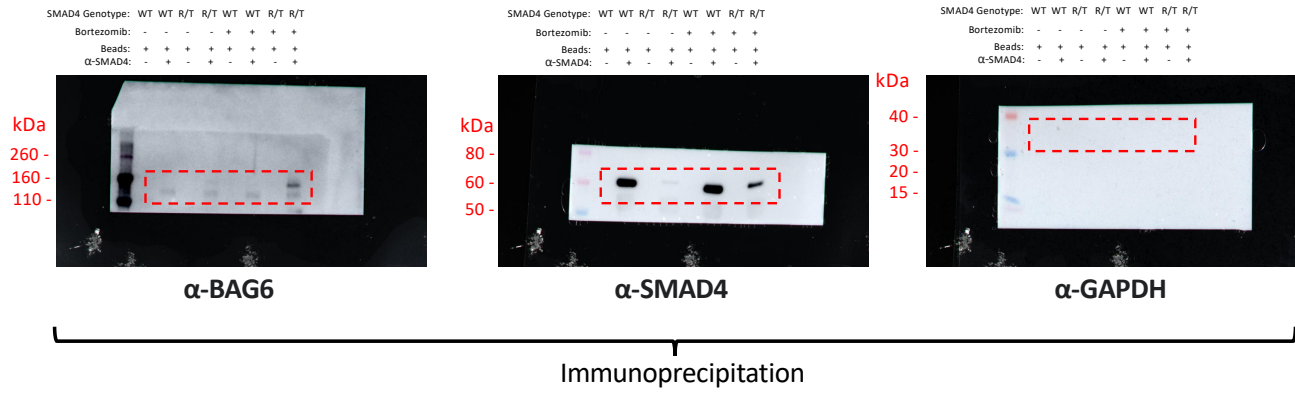**d**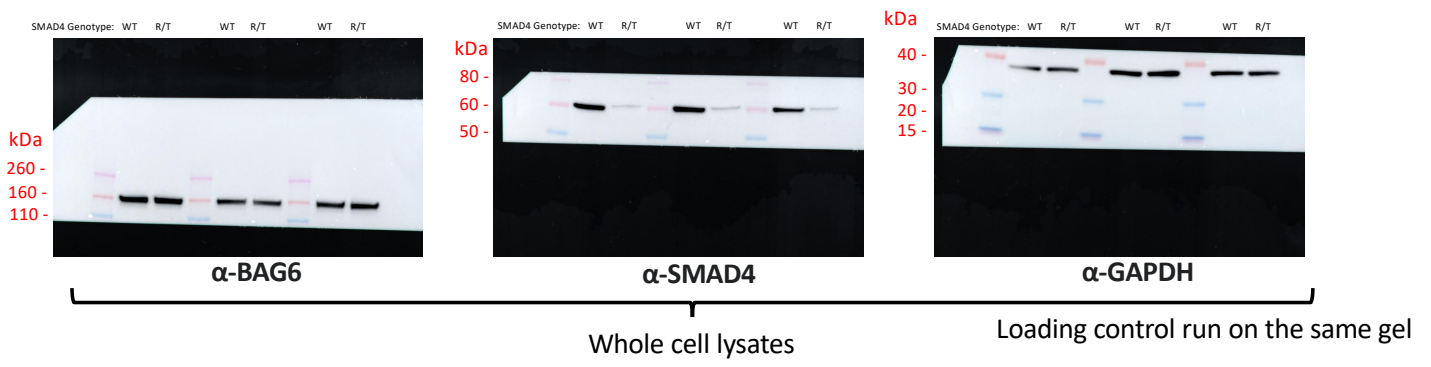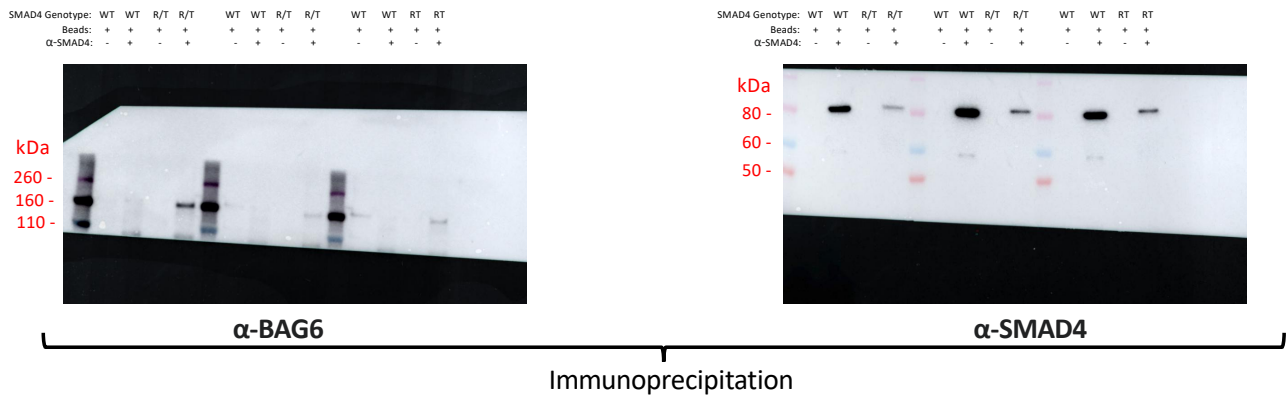

**e**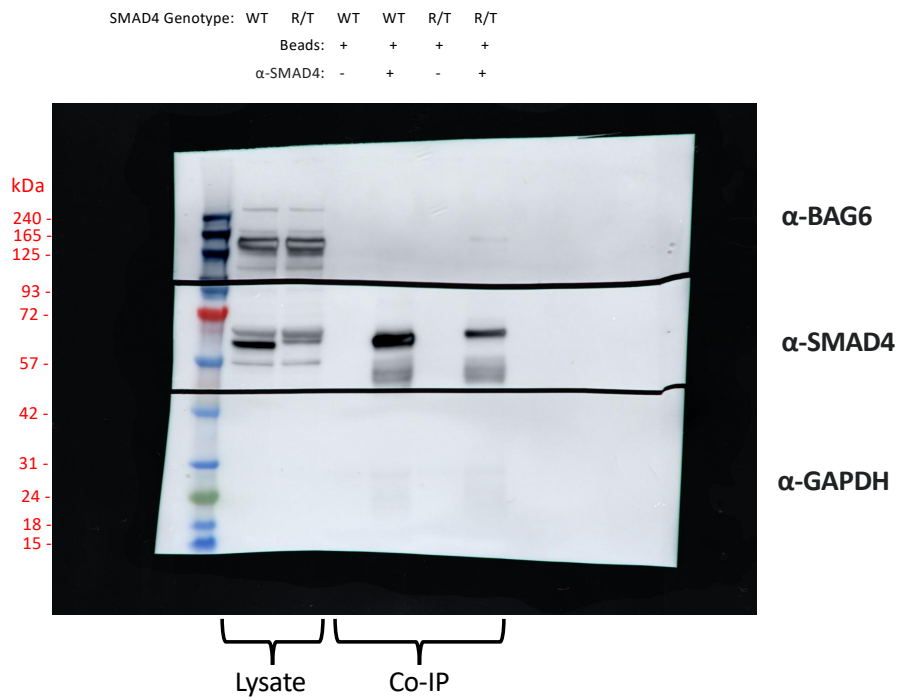**f**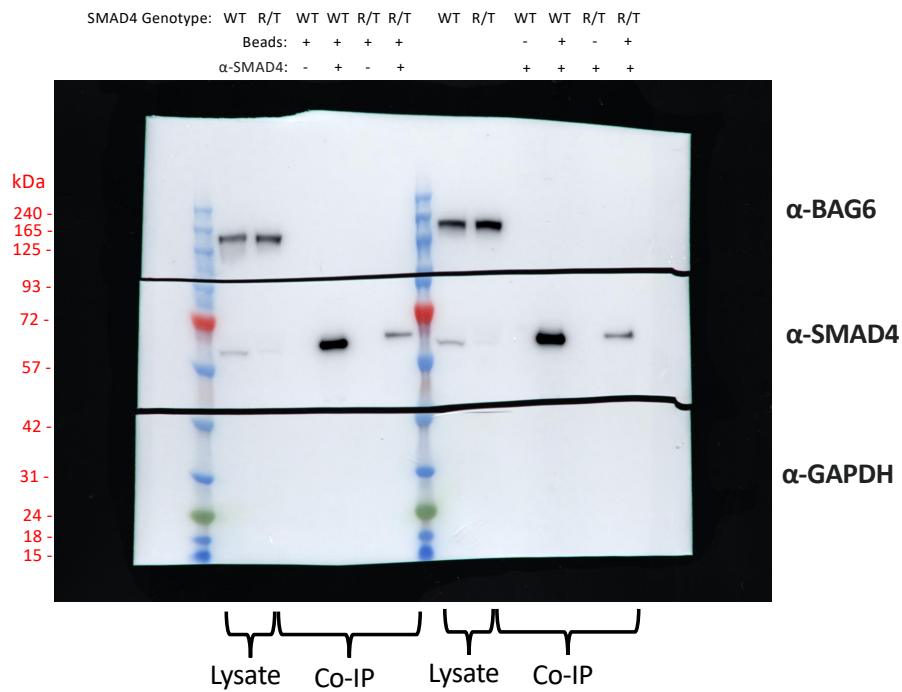

Over-exposure

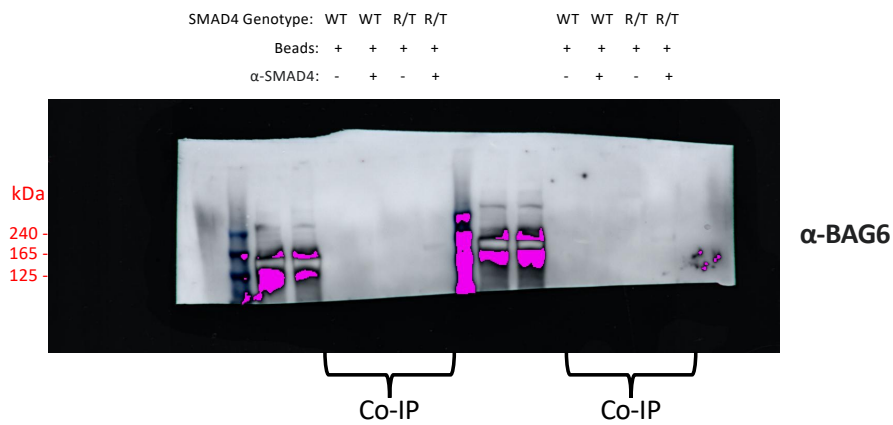

g

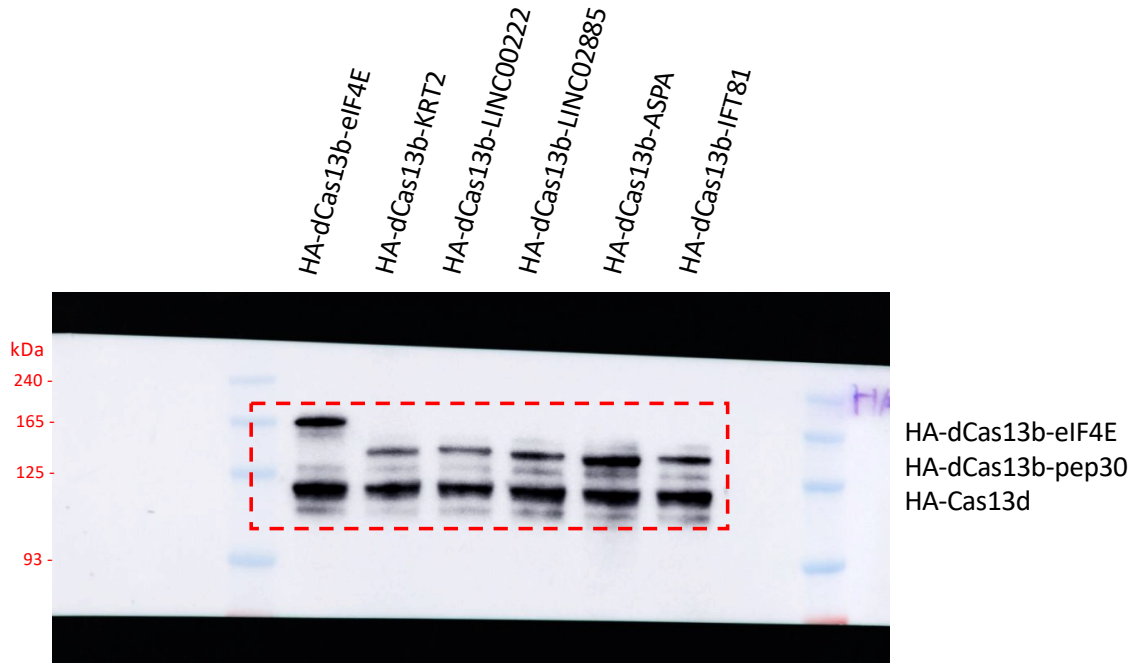

h

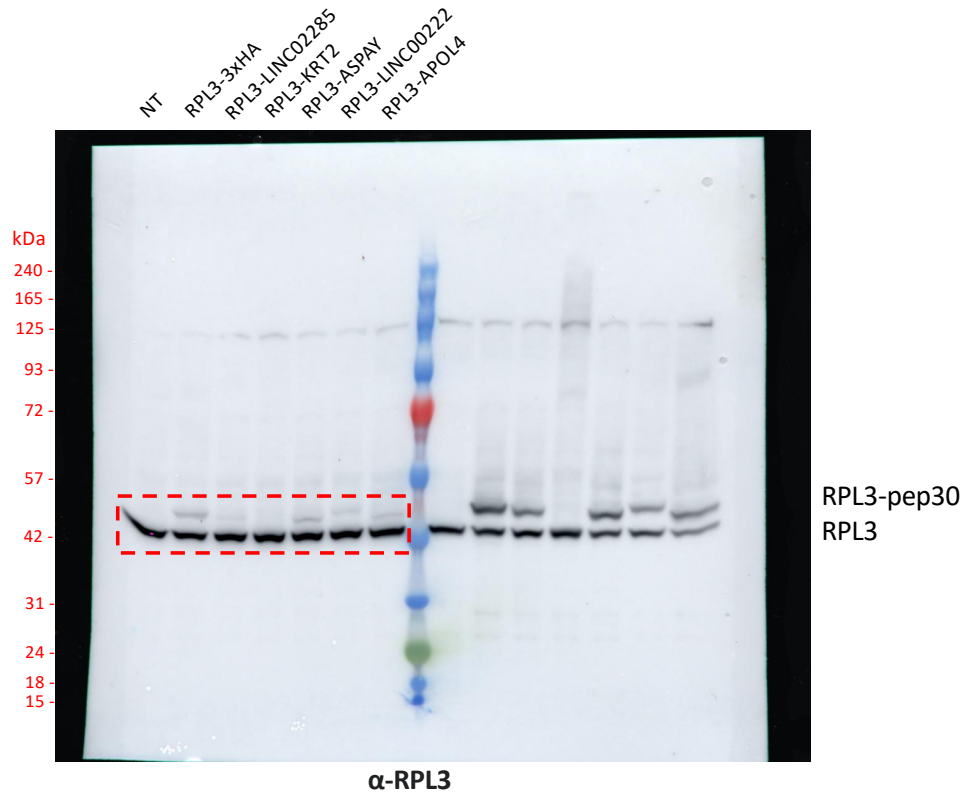

i

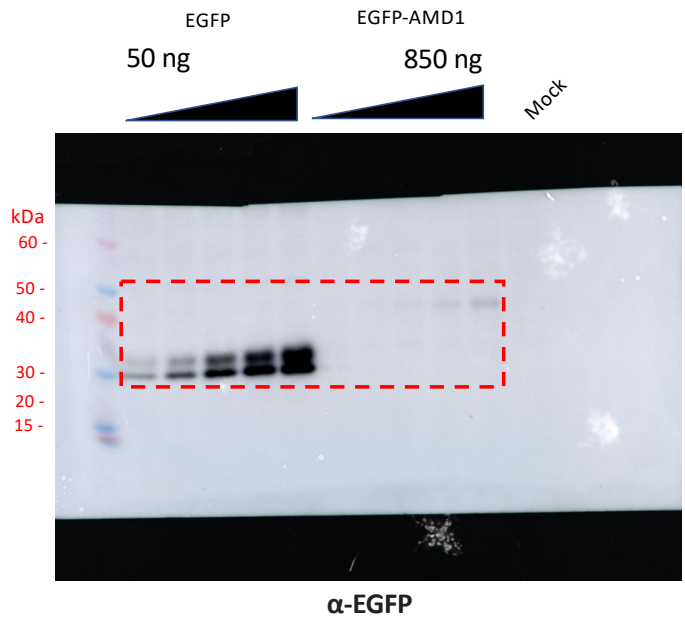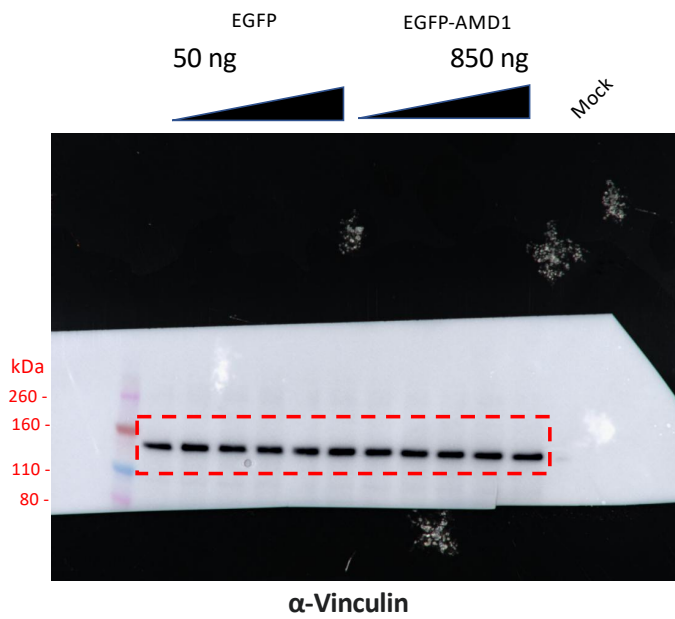

**j** Biological replicate 1

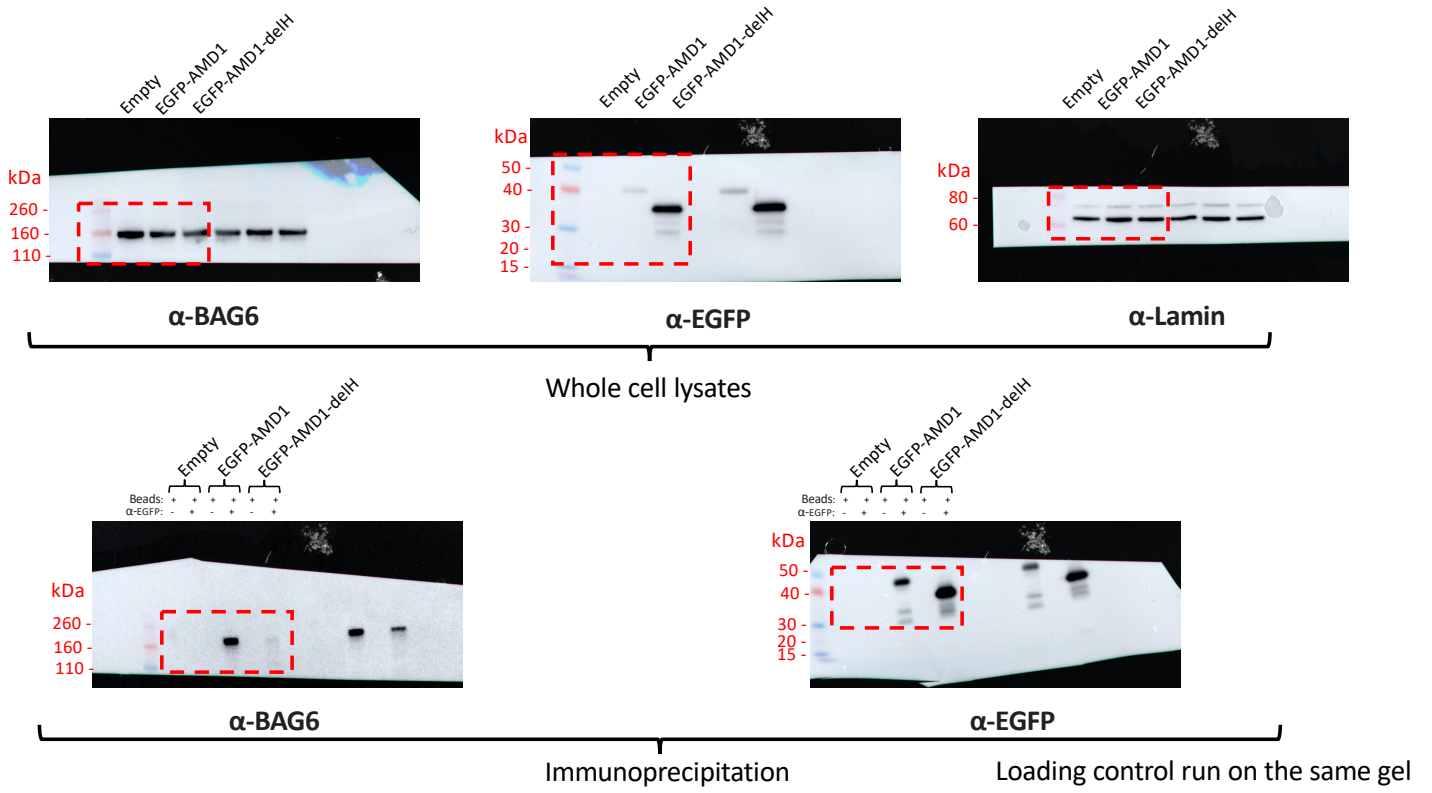

**k** Biological replicate 2-4

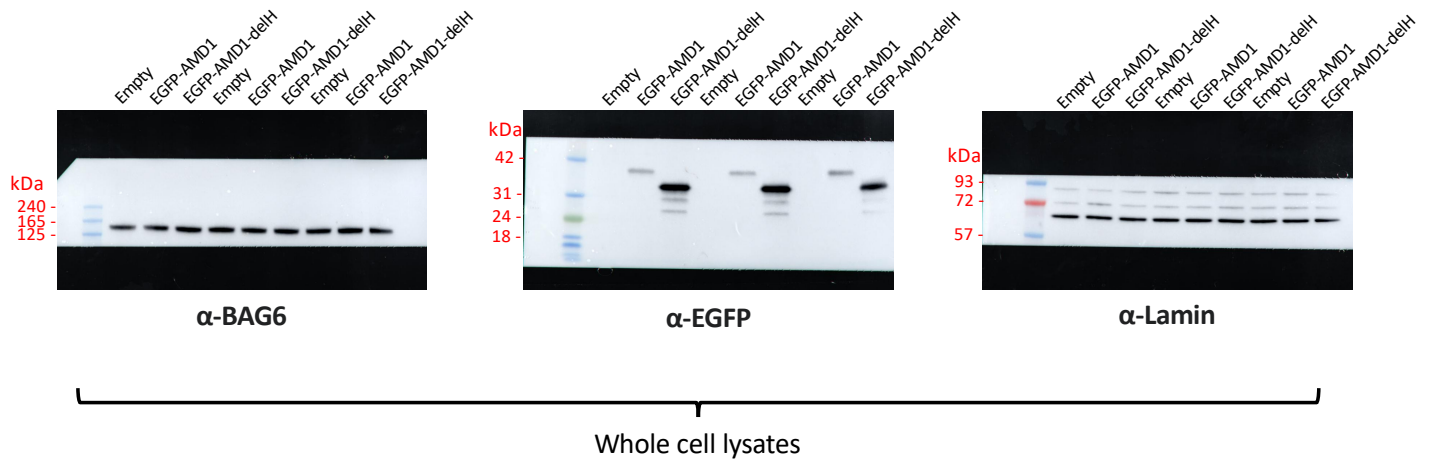

Biological replicate 2

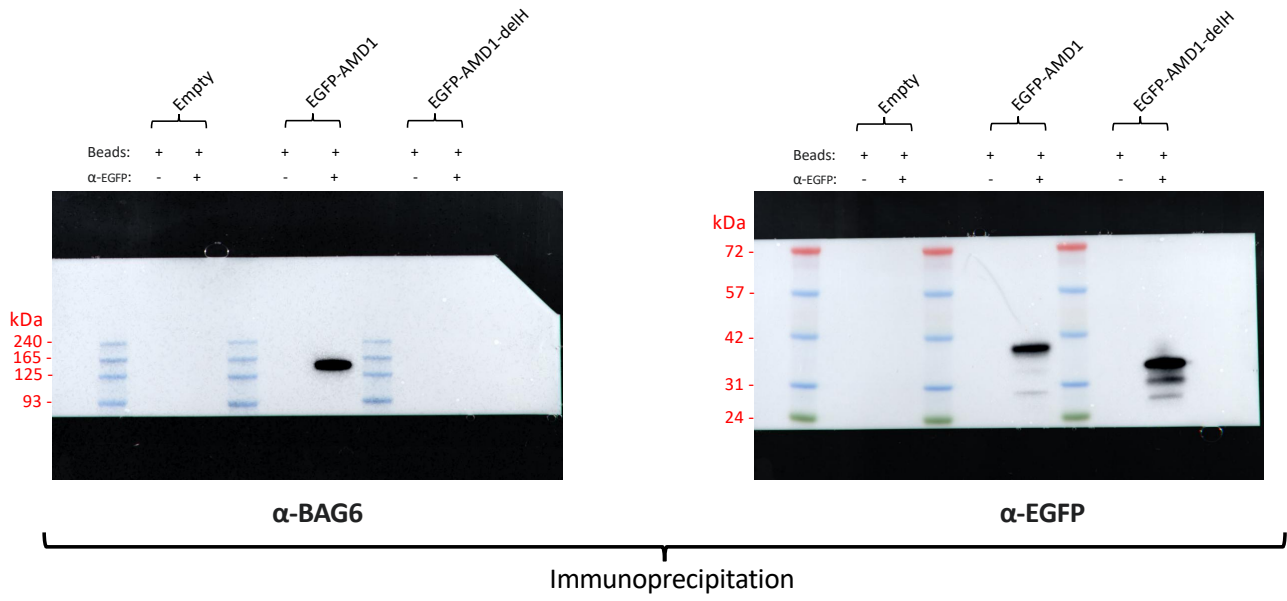

Biological replicate 3

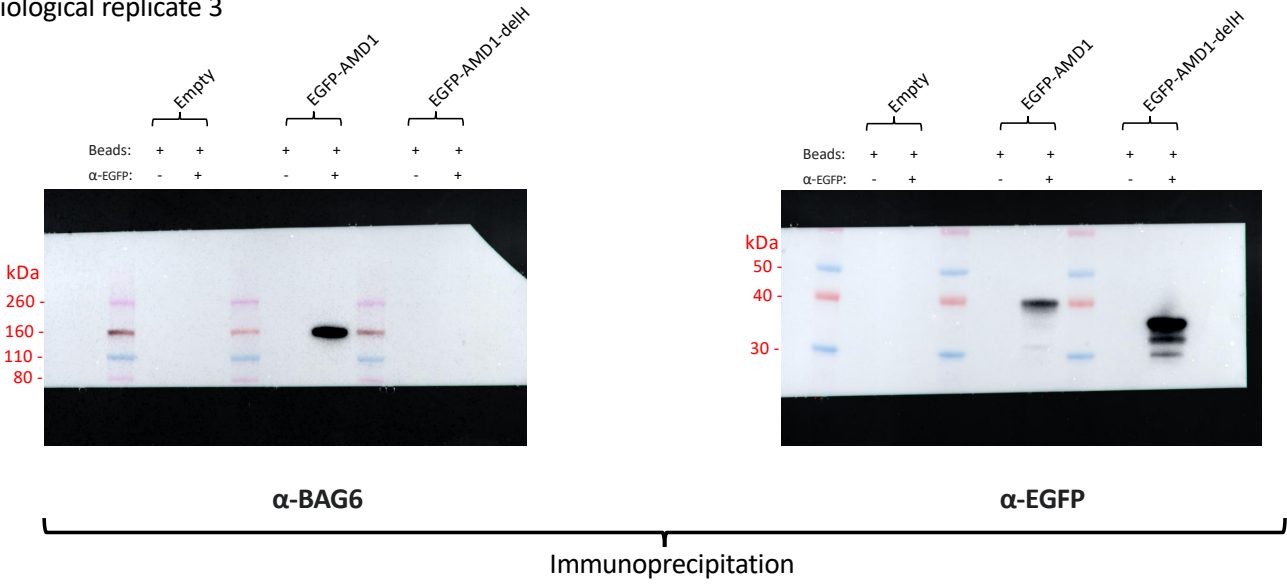

Biological replicate 4

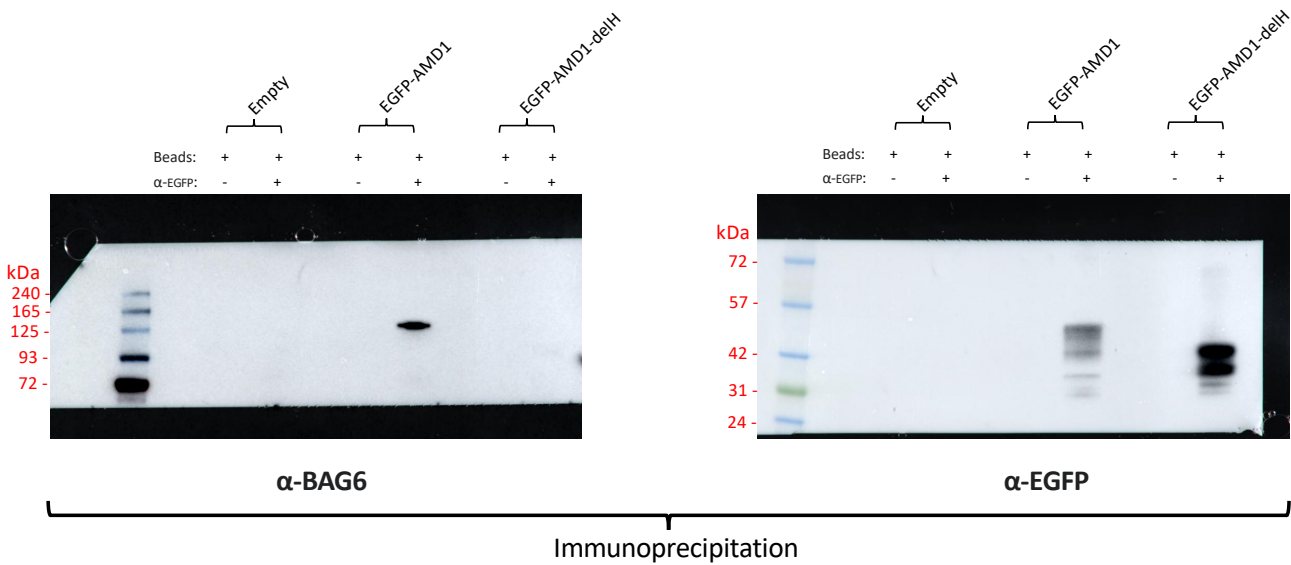



m

SMAD4 Genotype: WT WT R/T R/T R/T R/T  
BAG6 Genotype: WT WT WT WT K/O K/O  
siRNF126: - + - + - +

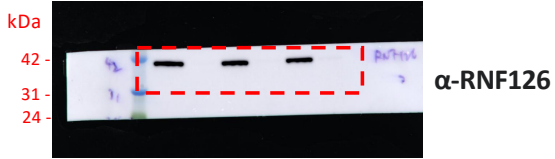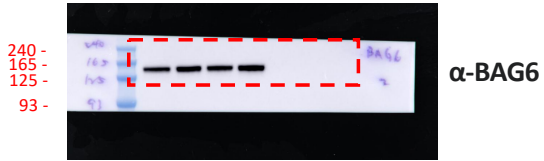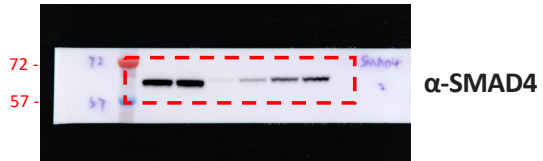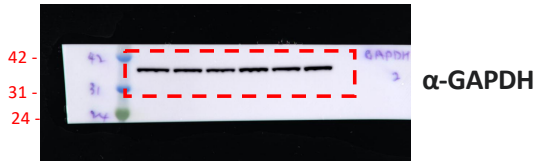

SMAD4 Genotype: WT WT R/T R/T R/T R/T  
BAG6 Genotype: WT WT WT WT K/O K/O  
siRNF126: - + - + - +

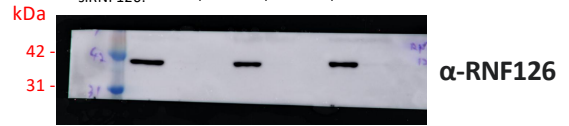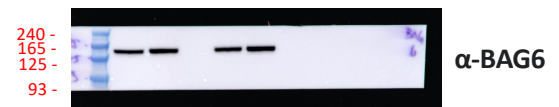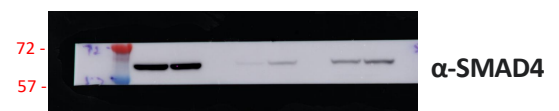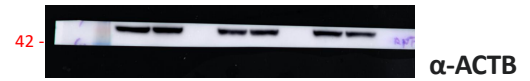

SMAD4 Genotype: WT WT R/T R/T R/T R/T  
BAG6 Genotype: WT WT WT WT K/O K/O  
siRNF126: - + - + - +

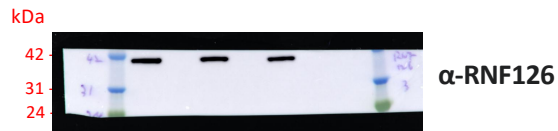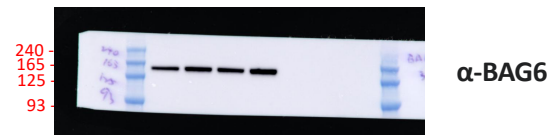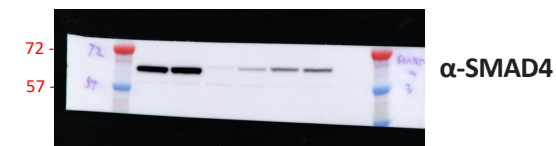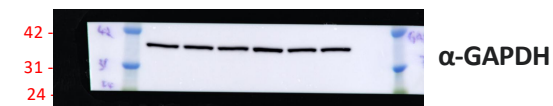

n

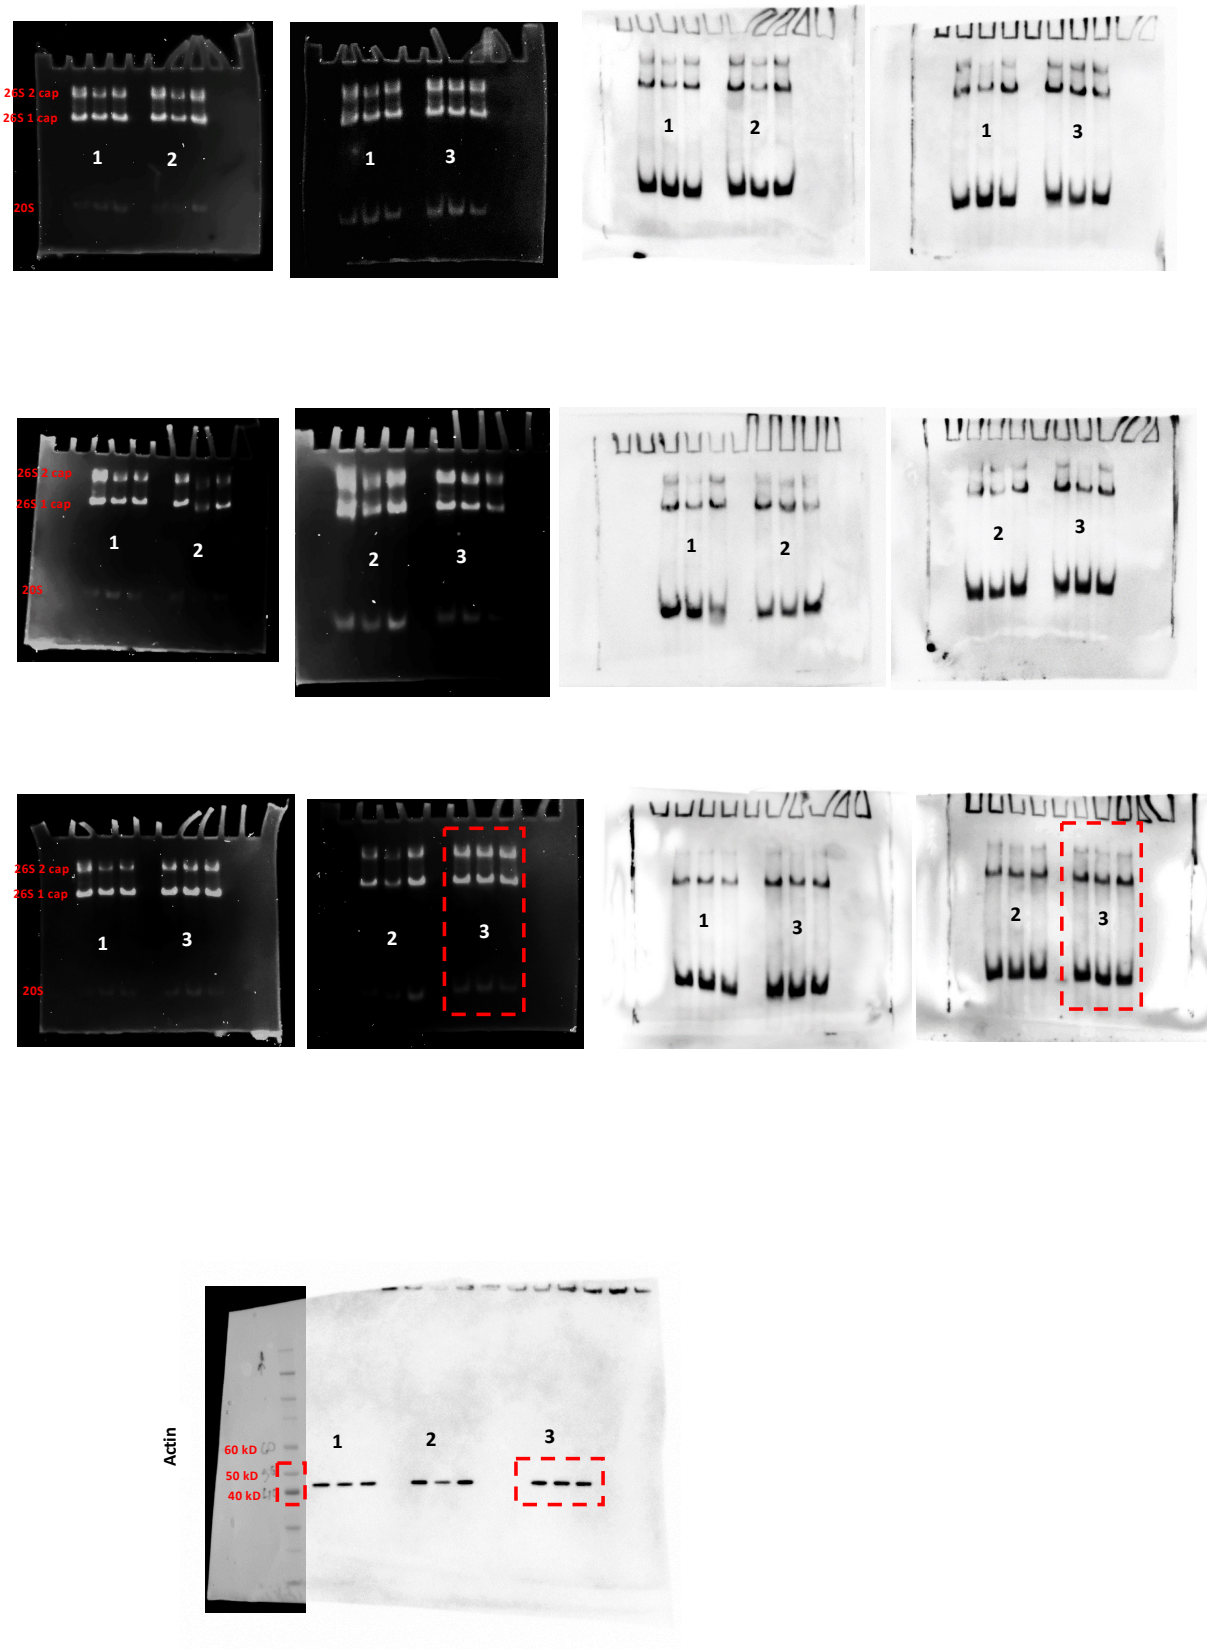

# Supplementary Figure 2

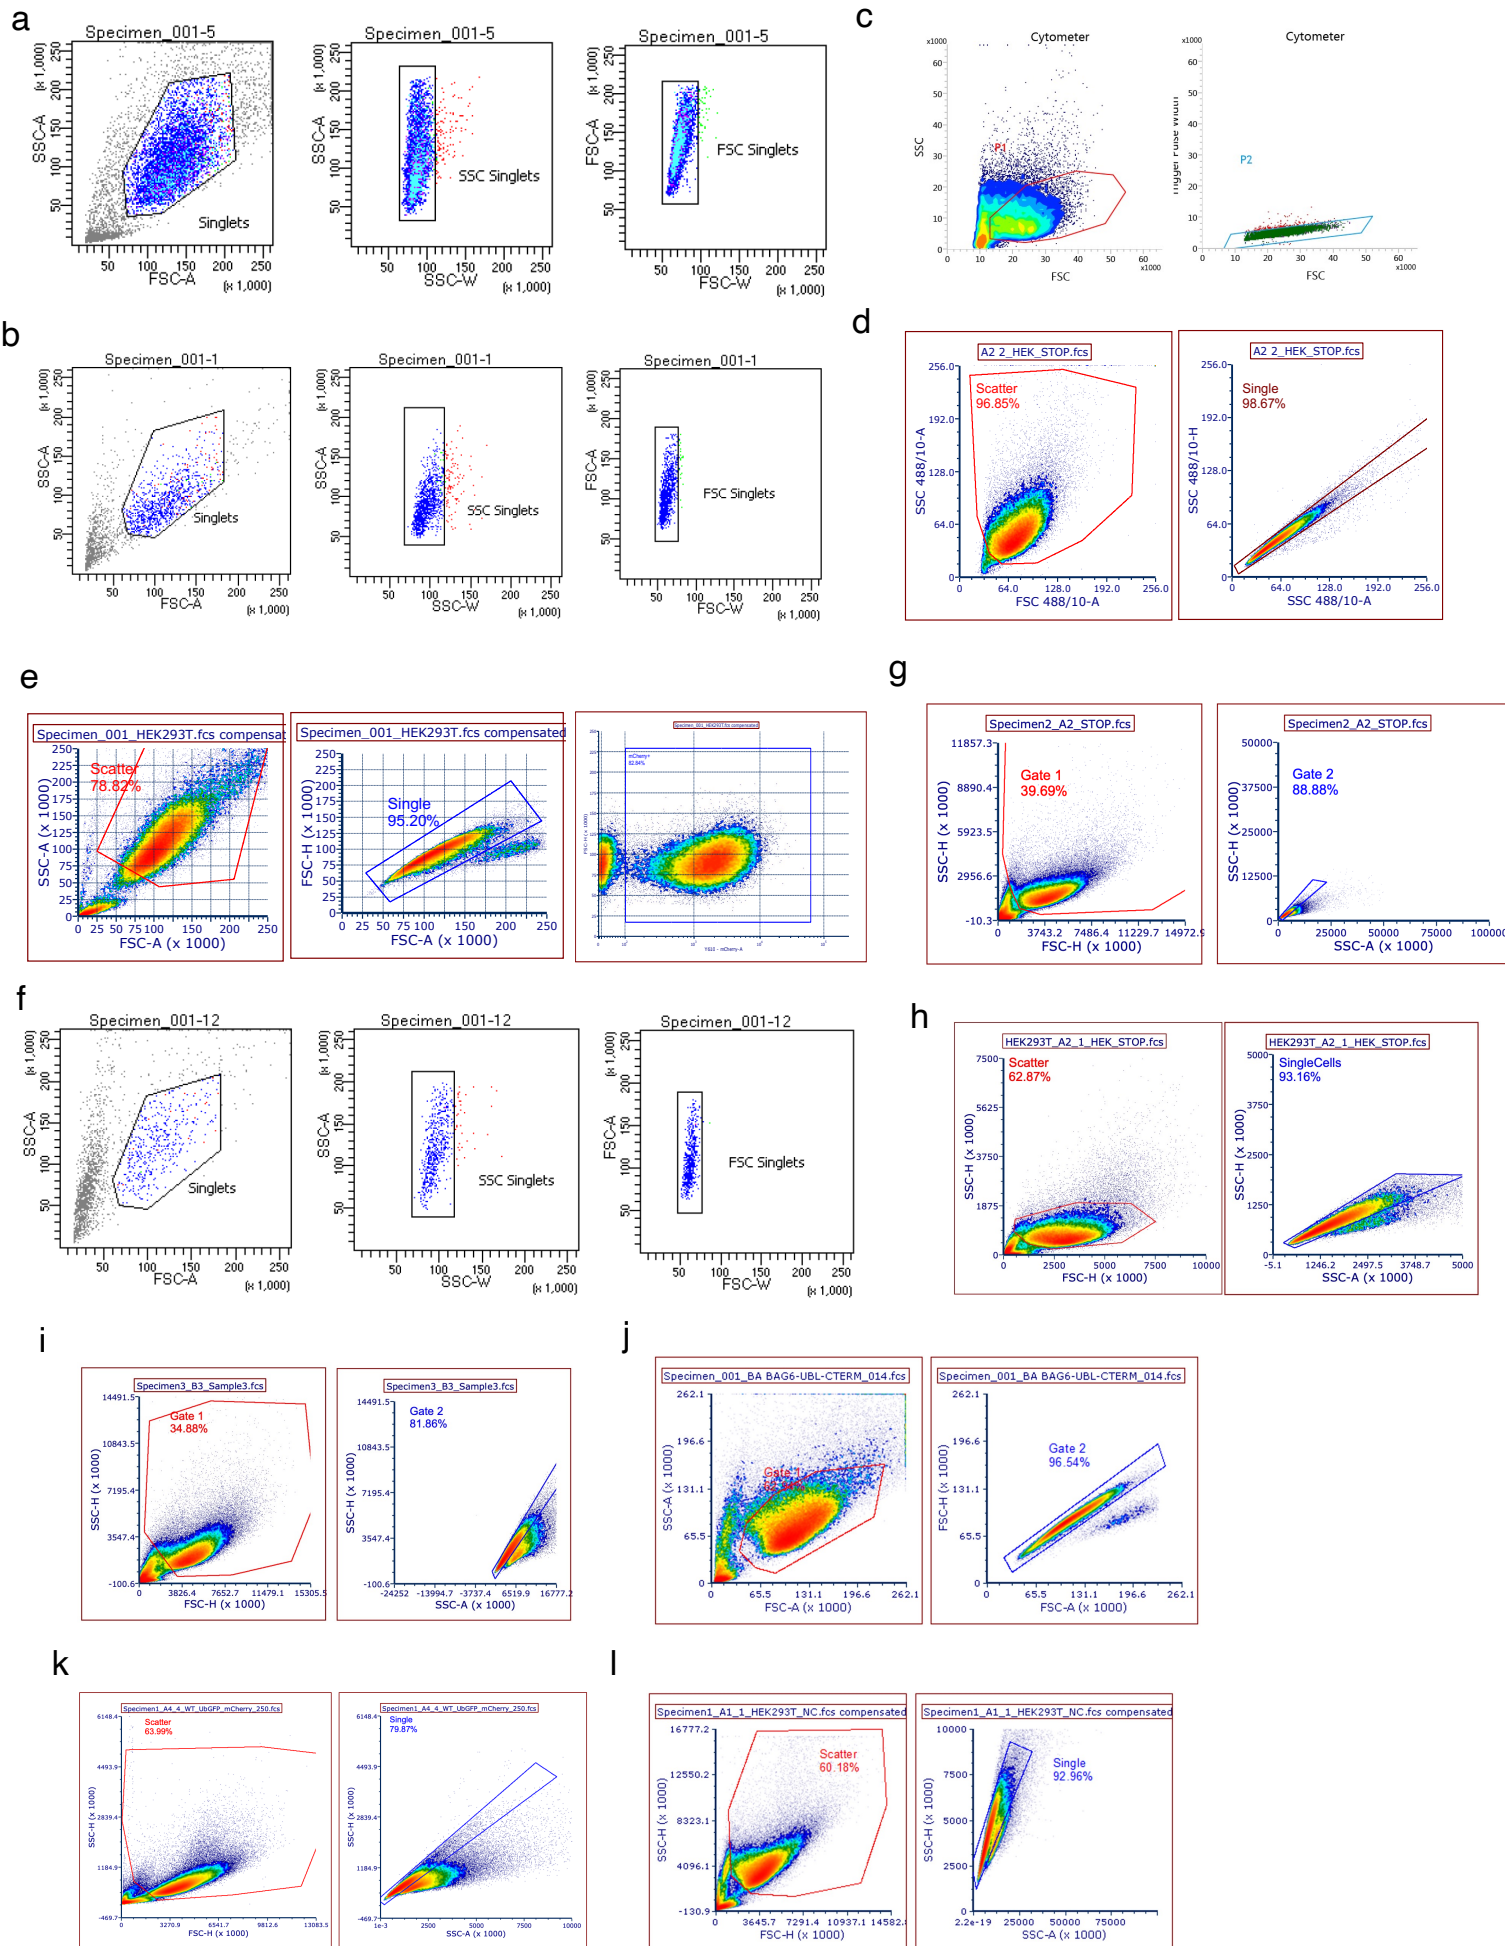

Supplement: NIHMS1933739-supplement-Supplementary_info.pdf [file NIHMS1933739-supplement-Supplementary_info.pdf]
